# Supplementary material for: Vitamin D Insufficiency Reduces Grip Strength, Grip Endurance and Increases Frailty in Aged C57Bl/6J Mice
Source: PubMed Central journal article supplement (PMC7599884; doi:10.3390/nu12103005), 2020-09-30
Supplement: nutrients-12-03005-s001.pdf [file nutrients-12-03005-s001.pdf]

**Figure S1.**

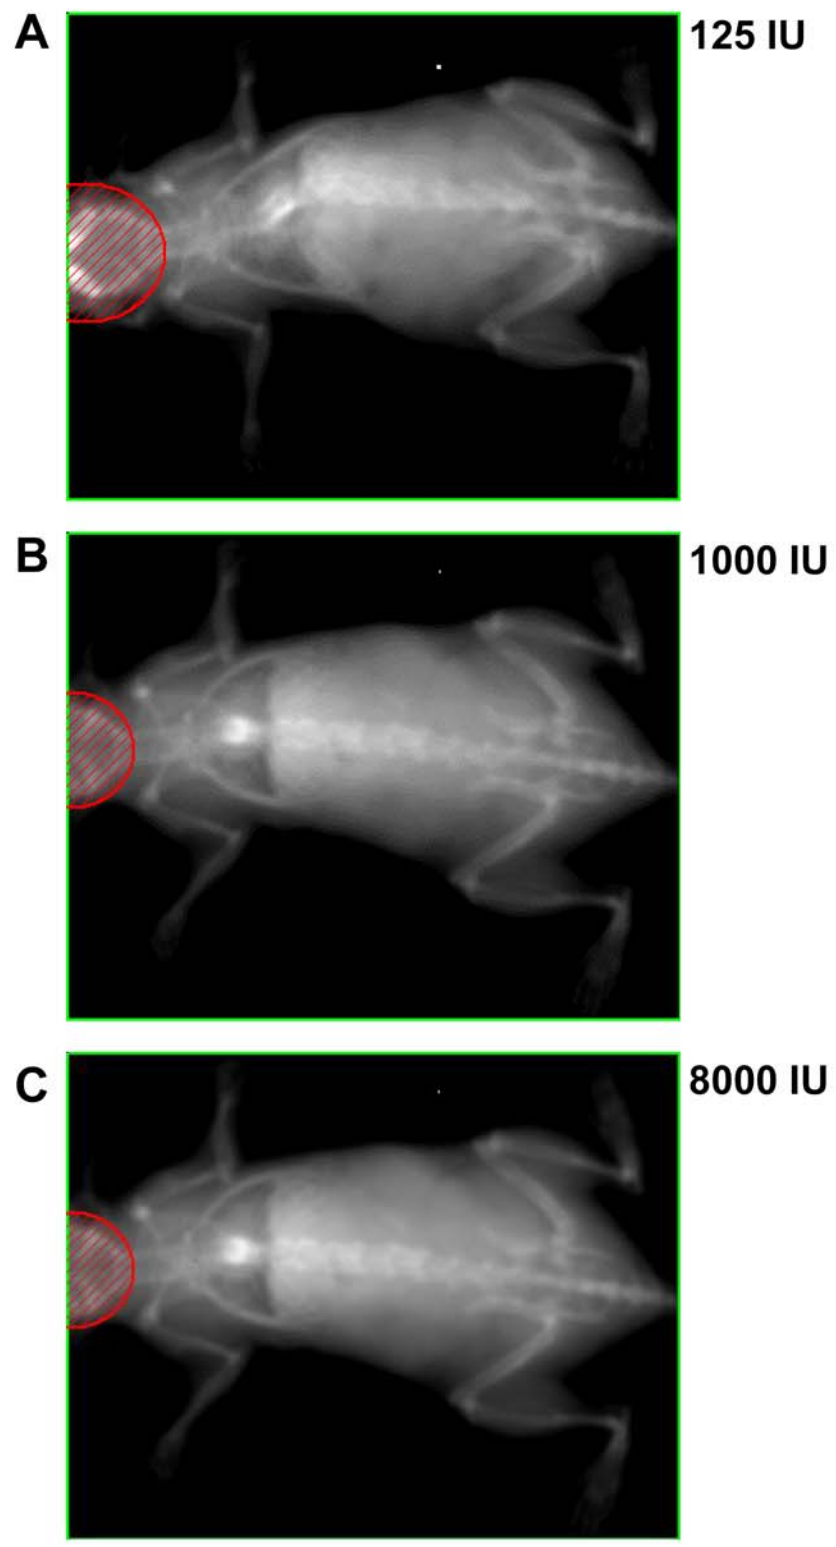

**Supplemental Figure 1.** Dual X-ray absorptiometry was used to acquire X-ray images of mice before and after 4 months of differential vitamin D supplementation. Representative images of mice closest to the group mean for bone mineral density at endpoint for 125IU (A), 1000IU (B), and 8000IU (C) supplementation groups, respectively.
